# Supplementary material for: An integrated-milliampere-level hydroelectric generator utilizing chemical-doped P-type and N-type graphites
Source: Royal Society of Chemistry journal article supplement (doi:10.1039/d3ta06080b), 2023-01-01
Supplement: d3ta06080b3.pdf [file d3ta06080b3.pdf]

# Integrated-milliampere-level hydroelectric generator utilizing chemical-doped P-type and N-type graphite

*Dunren He<sup>1</sup>, Wanyi Nie<sup>2</sup>, Huihui Huang<sup>1,\*</sup>*

<sup>1</sup>Key Laboratory for Micro/Nano Optoelectronic Devices of Ministry of Education & Hunan Provincial Key Laboratory of Low-Dimensional Structural Physics and Devices, School of Physics and Electronics, Hunan University, Changsha 410082, China.<sup>2</sup>Center for Integrated Nanotechnologies, Los Alamos National Laboratory, Los Alamos, NM, USA.

\* E-mails: [huangh@hnu.edu.cn](mailto:huangh@hnu.edu.cn)

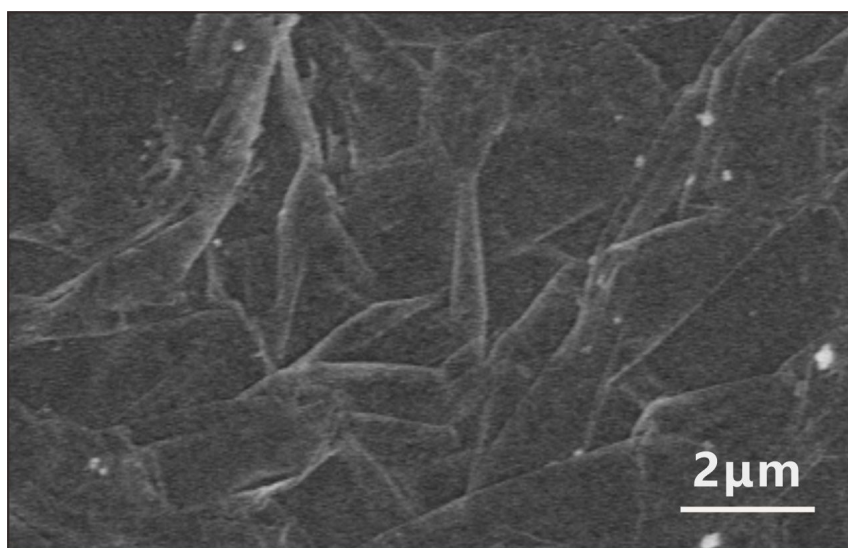

**Figure S1.** SEM image for the surface morphology of a typical graphite foil prepared.

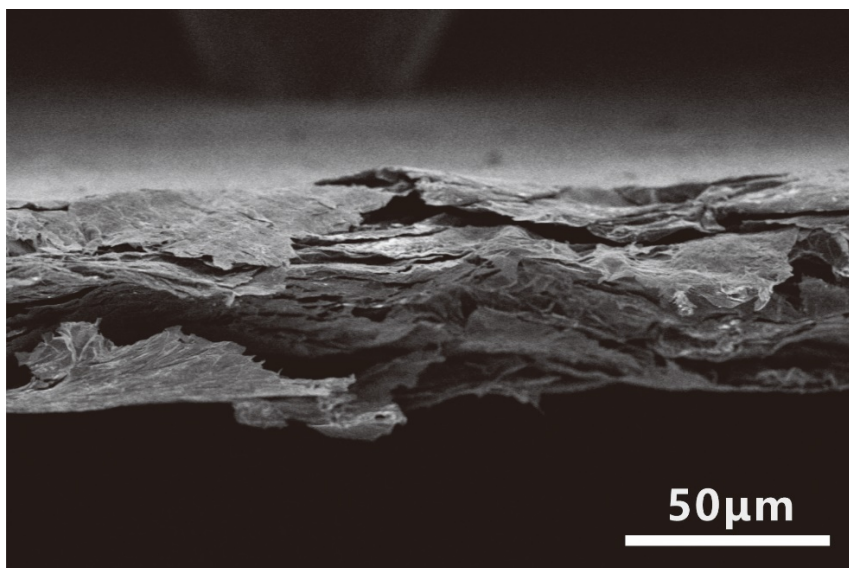

**Figure S2.** SEM image for the cross-section morphology of a typical graphite foil prepared.

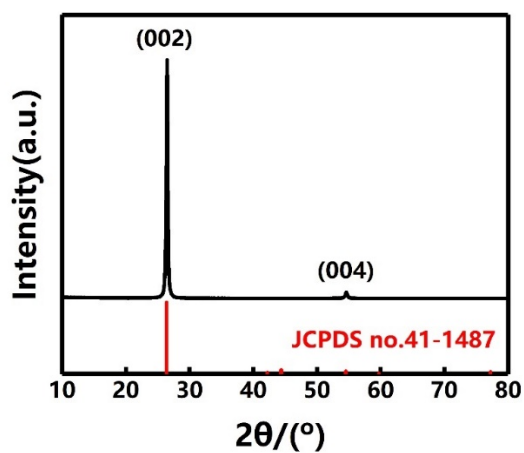

**Figure S3.** The XRD patterns of graphite foil and the standard card of graphite (JCPDS no. 411487).

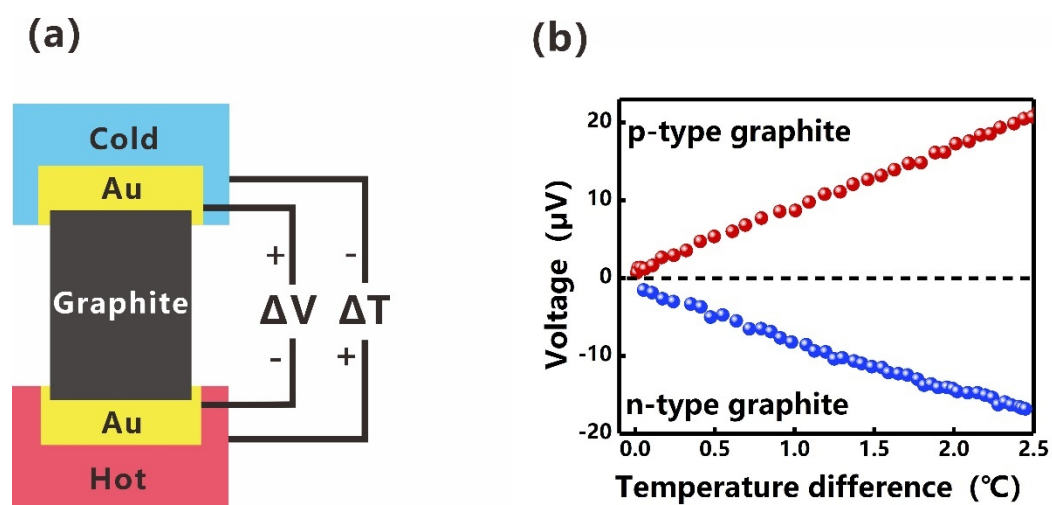

**Figure S4.** (a) Schematic illustration of the apparatus for measuring Seebeck coefficient at room

temperature in in nitrogen atmospheres. (b) Measurement results of the P-type graphite and the N-type graphite.

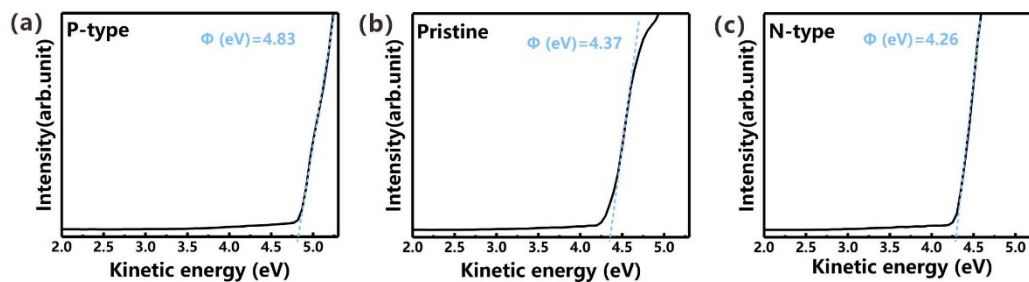

**Figure S5.** UPS spectra around the secondary-electron cutoff edge for (a) P-type, (b) Pristine and (c) N-type graphite.

The value of work function, defined as the difference between the vacuum level and the Fermi level, is calculated by the following equation:

$$\phi = h\nu - (E_f - E_{\text{cutoff}})$$

Where  $\phi$  is the work function,  $h\nu$  is the stimulating photonic energy (21.22 eV in this test),  $E_f$  is the Fermi edge energy, and  $E_{\text{cutoff}}$  is the cutoff edge energy. Shift the UPS data to align the Fermi edge energy with the stimulating photonic energy, ensuring that the value of the work function matches the cut-off edge energy.

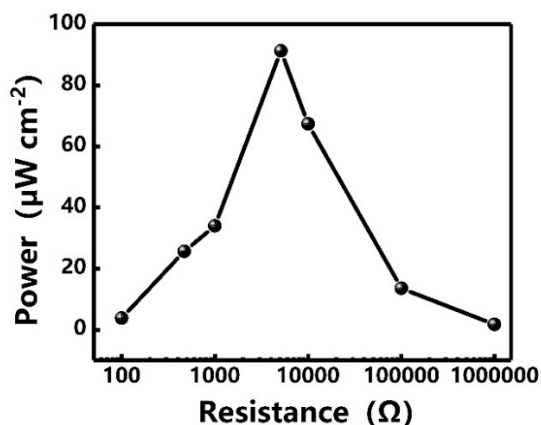

**Figure S6.** Power density of the WG-HEG as a function of external resistance ranging from 100 Ω to 10<sup>6</sup> Ω.

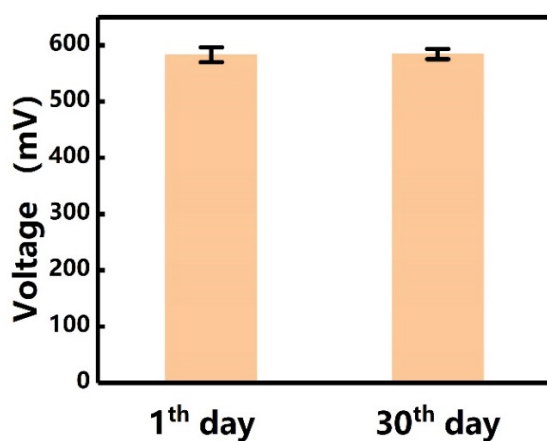

**Figure S7.** Open-circuit voltage from samples after being exposed to the ambient environment for 30 days and relatively fresh samples. The error bars in this supporting information represent the standard deviation of the statistical means from multiple measurements (n is 5 or more).

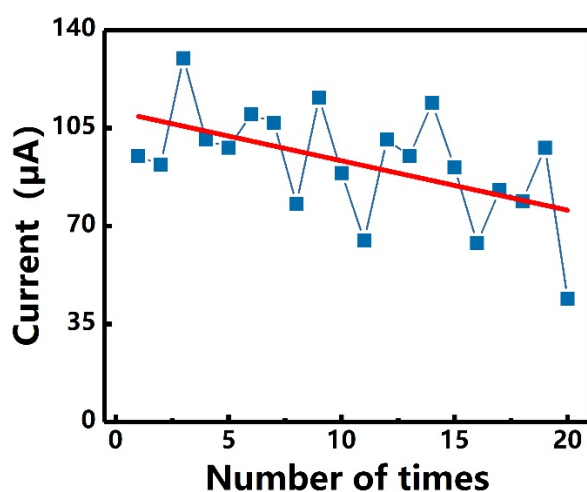

**Figure S8.** The current output of the WG-HEG was measured in response to multiple immersions of graphene in and out of tap water.

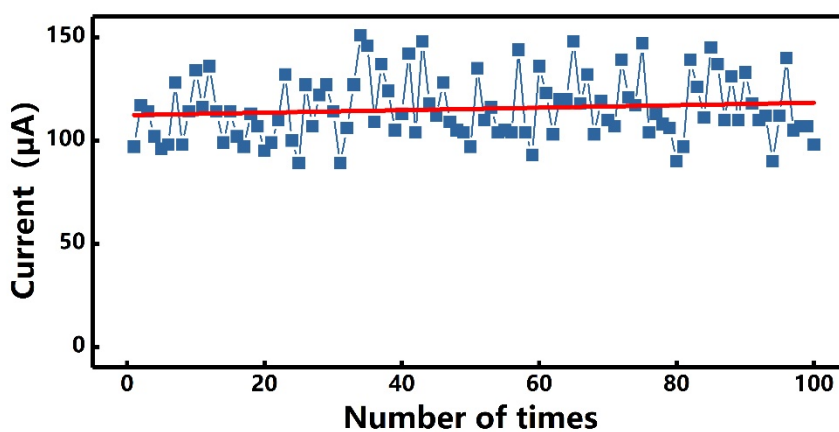

**Figure S9.** The current output of the WG-HEG was measured in response to multiple immersions of graphene in and out of tap water. The sample was subjected to simple impregnation after every 10 discharges.

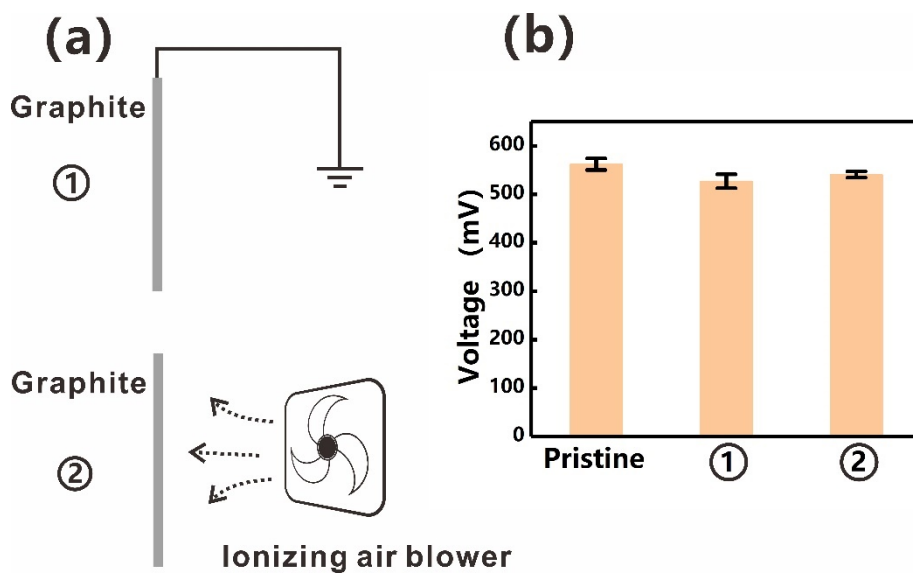

**Figure S10.**(a) ①Grounding and ②using an ionizing air blower for 1 hour. (b) Measurement results after removing possible pre-existing charges on surfaces.

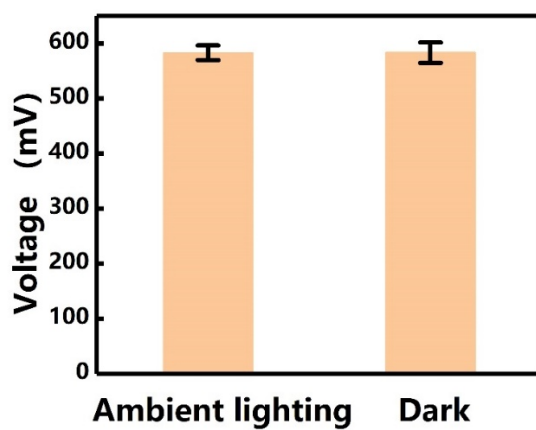

**Figure S11.** Open-circuit voltage from the WG-HEG devices with ambient lighting and in the dark.

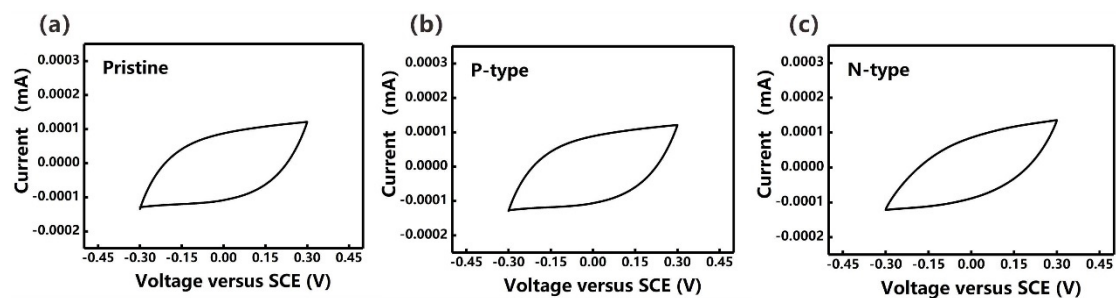

**Figure S12.** Cyclic voltammetry of the (a) Pristine, (b) P-type and (c) N-type graphite. The Cyclic voltammetry of graphite was measured in a Tap water with a Pt wire as the counter electrode, a saturated calomel reference electrode (filled with saturated KCl with a potential of 0.241 V versus SHE) and graphene as the working electrode. The CVs were taken at a scan rate of 10 mV s<sup>-1</sup> for each electrode.

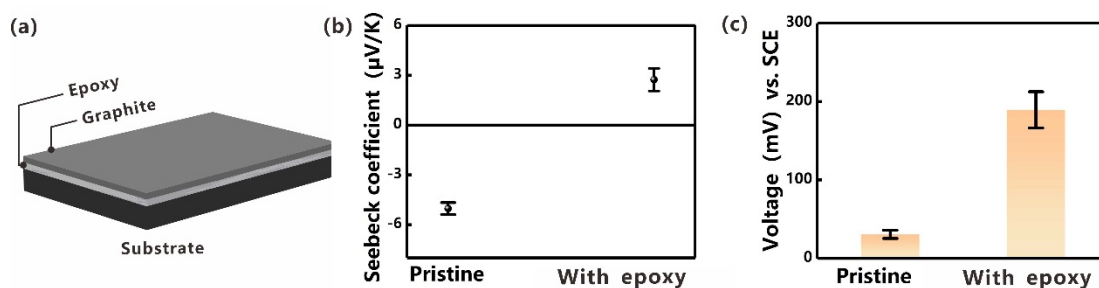

**Figure S13.** (a) Schematic drawing showing the graphite with epoxy (b) The average room temperature (290 K) Seebeck coefficient of the pristine graphite and graphite with epoxy. (c) The open-circuit voltage between graphite foils (pristine and with epoxy) and a saturated calomel electrode reference electrode at room temperature (290 K).

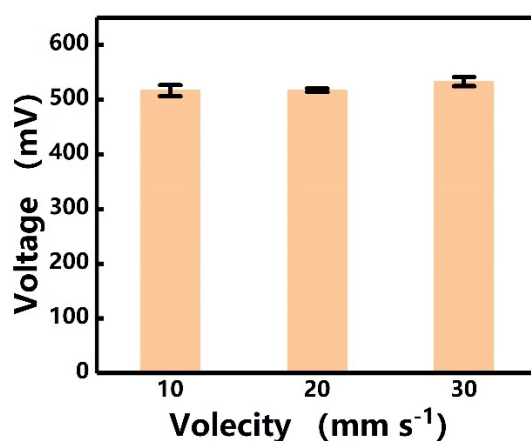

**Figure S14.** Open-circuit voltage from the WG-HEG devices with different immersing speed.

**Table S1.** The performance comparison of reported hydroelectric generators

| Hydroelectricity | Materials (Electrode)                                                      | Series number | Parallel number    | Voltage (V) | Current (mA) | Refs               |
|------------------|----------------------------------------------------------------------------|---------------|--------------------|-------------|--------------|--------------------|
| Moisture-induced |                                                                            |               |                    |             |              |                    |
|                  | Protein wires (Au)                                                         | 17            | 5                  | 10          | 0.0011       | 1 <sup>[1]</sup>   |
|                  | Polyelectrolyte (carbon tape)                                              | 1600          | 500                | 1000        | 0.016        | 2 <sup>[2]</sup>   |
|                  | Ionic liquid (Ag/AgCl)                                                     | 4             | 4                  | 1           | 0.05         | 3 <sup>[3]</sup>   |
|                  | Nafion and poly ( n-isopropylacrylamide ) (carbon paper)                   | 2             | 2                  | 4           | 0.04         | 4 <sup>[4]</sup>   |
|                  | Carbon-coated cotton fabric (Fe)                                           | 4             | 4                  | 1.2         | 0.08         | 5 <sup>[5]</sup>   |
|                  | Kraft paper And reassembled graphite (--)                                  | 30            | 1                  | 12          | 0.000025     | 6 <sup>[6]</sup>   |
|                  | Poly(4-styrenesulfonic acid) (Au)                                          | 3             | 1.5cm <sup>2</sup> | 2.3         | 0.2          | 7 <sup>[7]</sup>   |
|                  | Graphene oxide and sodium polyacrylate (Au/Ag)                             | 68            | -                  | 26.2        | -            | 8 <sup>[8]</sup>   |
|                  | Graphene oxide (Au)                                                        | 60            | -                  | 11.2        | -            | 9 <sup>[9]</sup>   |
|                  | Graphene oxide (silver paste)                                              | 5             | -                  | 2           | -            | 10 <sup>[10]</sup> |
|                  | Graphene oxide (Al)                                                        | 5             | 5                  | 1.32        | 10.5         | 11 <sup>[11]</sup> |
|                  | Ionic hydrogel and functionalized carbon (-)                               | 5             | 5                  | 3           | 0.03         | 12 <sup>[12]</sup> |
|                  | Poly(vinyl alcohol), phytic acid and glycerol-water binary solvent (Ag/Cu) | 260           | 300                | 210         | 7            | 13 <sup>[13]</sup> |
|                  | Graphene oxide (Au)                                                        | 8             | 8                  | 1.21        | 0.00397      | 14 <sup>[14]</sup> |
|                  | Titanium dioxide (indium tin oxide/Al)                                     | 3             | 3                  | 1.3         | 0.025        | 15 <sup>[15]</sup> |
|                  | Biological nanofibrils (Pt)                                                | 4             | 4                  | 0.4         | 0.0001       | 16 <sup>[16]</sup> |
|                  | Protein nanofibrils (ITO/Ti)                                               | 5             | 5                  | 2.44        | 0.00961      | 17 <sup>[17]</sup> |
|                  | Polyvinyl alcohol and Poly (4-styrenesulfonic acid)                        | 10            | 10                 | 9.2         | 0.0102       | 18 <sup>[18]</sup> |

|  |                                                                                                                    |    |    |      |         |                                 |
|--|--------------------------------------------------------------------------------------------------------------------|----|----|------|---------|---------------------------------|
|  | (carbon tape)                                                                                                      |    |    |      |         |                                 |
|  | Carbon black<br>(Cu)                                                                                               | 60 | -  | 33   | -       | 19 <sup>[1]</sup> <sub>9]</sub> |
|  | Fluorinated oxidized graphene<br>(-)                                                                               | 15 | 4  | 10   | 0.005   | 20 <sup>[2]</sup> <sub>0]</sub> |
|  | Geobacter sulfurreducens<br>(ITO)                                                                                  | 4  | 4  | 1.07 | 0.001   | 21 <sup>[2]</sup> <sub>1]</sub> |
|  | Cellulose nanofiber<br>(Cu)                                                                                        | 4  | -  | 3    | -       | 22 <sup>[2]</sup> <sub>2]</sub> |
|  | Molybdenum disulfide<br>(stainless-steel)                                                                          | 12 | 1  | 1.7  | 0.00233 | 23 <sup>[2]</sup> <sub>3]</sub> |
|  | Biological nanofibrils<br>(Pt)                                                                                     | 3  | 3  | 250  | 0.00012 | 24 <sup>[2]</sup> <sub>4]</sub> |
|  | High-valent metal cation<br>(Au)                                                                                   | 4  | 4  | 0.35 | 0.00175 | 25 <sup>[2]</sup> <sub>5]</sub> |
|  | poly(4-styrenesulfonic acid)<br>and poly(vinyl alcohol)<br>(Ag nanowires)                                          | 2  | 2  | 1.2  | 0.004   | 26 <sup>[2]</sup> <sub>6]</sub> |
|  | HCl/polyvinyl alcohol<br>(carbon nanotube)                                                                         | 6  | -  | 1.5  | -       | 27 <sup>[2]</sup> <sub>7]</sub> |
|  | Graphene oxide<br>(Ag wire)                                                                                        | 10 | 10 | 3    | 0.042   | 28 <sup>[2]</sup> <sub>8]</sub> |
|  | MXene/cellulose/<br>polystyrene sulfonic acid<br>(Ag nanowires)                                                    | 4  | 4  | 1.1  | 0.0058  | 29 <sup>[2]</sup> <sub>9]</sub> |
|  | Cationic silk nanofibrils<br>(Pt)                                                                                  | 3  | 3  | 0.36 | 0.00035 | 30 <sup>[3]</sup> <sub>0]</sub> |
|  | LiCl-loaded cellulon paper and<br>carbon-black-loaded cellulon<br>paper<br>(carbon tape)                           | 3  | 2  | 2    | 0.01    | 31 <sup>[3]</sup> <sub>1]</sub> |
|  | Nanochannel anodic<br>aluminum oxide<br>(nanoporous carbon<br>nanotubes/In-Ga)                                     | 20 | 1  | 18   | 0.0012  | 32 <sup>[3]</sup> <sub>2]</sub> |
|  | Sodium alginate , silicon<br>dioxide nanofiber , and<br>reduced graphene oxide<br>(Au)                             | 21 | 16 | 11   | 1.3     | 33 <sup>[3]</sup> <sub>3]</sub> |
|  | Poly([2-<br>(methacryloyloxy)ethyl]<br>Dimethyl-(3-sulfopropyl)<br>ammonium hydroxide-co-<br>acrylic acid)<br>(Au) | 5  | -  | 2    | -       | 34 <sup>[3]</sup> <sub>4]</sub> |
|  | Graphene oxide<br>(Ag/AgCl ink)                                                                                    | 6  | 1  | 1.9  | 0.0334  | 35 <sup>[3]</sup> <sub>5]</sub> |
|  | Graphene oxide<br>(Au/Ag)                                                                                          | 15 | 1  | 18   | 0.00012 | 36 <sup>[3]</sup> <sub>6]</sub> |



|                       |                                                                                             |     |                   |       |            |                    |
|-----------------------|---------------------------------------------------------------------------------------------|-----|-------------------|-------|------------|--------------------|
|                       | Electroactive bacteria (ITO)                                                                | 30  | 30                | 10    | 0.052      | 37 <sup>[37]</sup> |
|                       | TiO <sub>2</sub> nanowires/cotton fibers and an asymmetrically distributed polypyrrole (Fe) | 3   | 3                 | 1.45  | 0.018      | 38 <sup>[38]</sup> |
|                       | Poly (4-styrenesulfonic acid) (Al)                                                          | 5   | 5                 | 5.5   | 0.0047     | 39 <sup>[39]</sup> |
|                       | Polyvinyl alcohol (Al /Au-coated stainless-steel)                                           | 5   | 5                 | 3.2   | 0.00014    | 40 <sup>[40]</sup> |
|                       | Print paper (Stainless steel metal plate)                                                   | 5   | 5                 | 1     | 0.00012    | 41 <sup>[41]</sup> |
|                       | Graphene oxide/ reduced graphene oxide (Ag)                                                 | 175 | 1                 | 192   | 0.17       | 42 <sup>[42]</sup> |
|                       | Polyacrylonitrile and sodium dodecyl benzene sulfonate (ITO/Zn/Al)                          | 5   | 5                 | 3.6   | 0.012      | 43 <sup>[43]</sup> |
|                       | TiO <sub>2</sub> /ZrO <sub>2</sub> composite nanofiber membrane (ITO/ Au-coated Al)         | 4   | 4                 | 2.98  | 0.00001582 | 1 <sup>[44]</sup>  |
|                       | 3-Acrylamidopropyl[trimethylammonium] chloride and poly (sodium 4-styrene sulfonate) (Ag)   | 5   | 5                 | 0.045 | 0.0000008  | 1 <sup>[45]</sup>  |
|                       | Graphene oxide (carbon)                                                                     | 5   | 5                 | 11.9  | 0.0827     | 1 <sup>[46]</sup>  |
| Liquid-induced        |                                                                                             |     |                   |       |            |                    |
|                       | cellulose/carbon nanotubes (Cu)                                                             | 1   | 6                 | 0.16  | 0.0007     | 18 <sup>[47]</sup> |
|                       | CuO nanowires (silver paste)                                                                | 4   | 4                 | 0.75  | 0.0012     | 45 <sup>[48]</sup> |
|                       | Single-layer MoS <sub>2</sub> (silver paste)                                                | 3   | 3 <sup>[49]</sup> | 14    | 0.000015   | 1 <sup>[49]</sup>  |
|                       | Silicon nanowires (graphite)                                                                | 3   | 4                 | 3.7   | 0.0012     | 1 <sup>[50]</sup>  |
|                       | Graphene and polytetrafluoroethylene (-)                                                    | 3   | 3                 | 1.1   | 0.008      | 1 <sup>[51]</sup>  |
|                       | Carbon nanotube/transition metal oxide (-)                                                  | 8   | 1                 | 1.8   | 0.04       | 1 <sup>[52]</sup>  |
| (Tribovoltaic effect) | Water (Pt/ indium gallium zinc oxide/Al)                                                    | 6   | 3                 | 2.5   | 0.014      | 2 <sup>[53]</sup>  |
| (Tribovoltaic effect) | Water (silicon/Al)                                                                          | 3   | 1                 | 2.7   | 0.0007     | 1 <sup>[54]</sup>  |
| Evaporation-induced   |                                                                                             |     |                   |       |            |                    |
|                       | carbon black                                                                                | 4   | 4                 | 1.25  | 0.0001     | 1 <sup>[55]</sup>  |

|  |                                                                                  |     |        |      |         |                    |
|--|----------------------------------------------------------------------------------|-----|--------|------|---------|--------------------|
|  | (multiwalled carbon nanotube)                                                    |     |        |      |         |                    |
|  | Al <sub>2</sub> O <sub>3</sub> and carbon black (conductive carbon paste)        | 6   | 6      | 16   | 0.00845 | 47 <sup>[56]</sup> |
|  | MoS <sub>2</sub> /SiO <sub>2</sub> (silver paste)                                | 6   | 6      | 4.2  | 0.0024  | 48 <sup>[57]</sup> |
|  | Carbon black/PVA (Fe)                                                            | 100 | 101.07 | 10   | 2.2     | 49 <sup>[58]</sup> |
|  | poly(styrene sulfonicacid) and polyacrylicacid cellulose (conductive carbon ink) | 2   | 1      | 0.8  | 0.00045 | 50 <sup>[59]</sup> |
|  | Functionalized conductive carbon black (Cu)                                      | 6   | 6      | 3.7  | 0.34    | 51 <sup>[60]</sup> |
|  | Nanostructured silicon nanowire arrays (graphite/PEDOT:PSS/cellulose fabric/)    | 4   | -      | 2.4  | -       | 52 <sup>[61]</sup> |
|  | Silicon nanowire arrays (graphite/Ag)                                            | 4   | -      | 1.1  | -       | 53 <sup>[62]</sup> |
|  | Carbon nanospheres and TiO <sub>2</sub> nanowires (carbon ink)                   | 4   | 4      | 6.2  | 0.00055 | 54 <sup>[63]</sup> |
|  | Reduced graphene oxide (super-aligned carbon nanotube buckypapers)               | 6   | 1      | 2.34 | 0.1     | 55 <sup>[64]</sup> |
|  | A piece of wood (carbon paste)                                                   | 4   | 4      | 1.2  | 0.04    | 56 <sup>[65]</sup> |
|  | Al <sub>2</sub> O <sub>3</sub> (carbon paste)                                    | 6   | 6      | 14.8 | 0.0022  | 57 <sup>[66]</sup> |
|  | PEDOT:PSS (gold-coated electrode)                                                | 4   | 4      | 3.1  | 0.1834  | 58 <sup>[67]</sup> |
|  | SiO <sub>2</sub> nanofiber (Al)                                                  | 5   | 5      | 2.1  | 0.0017  | 1 <sup>[68]</sup>  |

Only one of the works with similar performance is selected to be displayed in the main text, and the work displayed in the main text is in brackets.

6/49(49)

41/55(55)

14/26/29/51(51)

31/17(17)

50/57(57)

12/28(28)

37/46(46)

Additionally, no work utilizing active electrode materials was presented in the main text. In the form, active electrode materials are denoted in red font, while acidic materials are indicated in blue font. Both types of materials are marked with asterisks. It is essential to emphasize that meticulous consideration should be given to eliminating any potential contributions resulting from the interaction between the liquid and metal electrodes. If the electrodes or functional channels comprise active materials, they may come into contact with water, leading to the formation of a metal-air battery under ambient conditions. This process would cause electrochemical energy to be irreversibly converted into electricity. Thus, contributions resulting from the metal-air battery should be avoided, as they may lead to inaccurate or misleading results<sup>[69]</sup>.

## References:

- [1] X. Liu, H. Gao, J. E. Ward, X. Liu, B. Yin, T. Fu, J. Chen, D. R. Lovley, J. Yao, *Nature* **2020**, 578, 550.
- [2] H. Wang, Y. Sun, T. He, Y. Huang, H. Cheng, C. Li, D. Xie, P. Yang, Y. Zhang, L. Qu, *Nat Nanotechnol* **2021**, 16, 811.
- [3] D. Lv, S. Zheng, C. Cao, K. Li, L. Ai, X. Li, Z. Yang, Z. Xu, X. Yao, *Energ Environ Sci* **2022**, 15, 2601.
- [4] C. Liu, S. Wang, X. Wang, J. Mao, Y. Chen, N. X. Fang, S. Feng, *Energ Environ Sci* **2022**, 15, 2489.
- [5] J. Bae, T. G. Yun, B. L. Suh, J. Kim, I. Kim, *Energ Environ Sci* **2020**, 13, 527.
- [6] K. S. Moreira, D. Lermen, L. P. Dos Santos, F. Galembeck, T. A. L. Burgo, *Energ Environ Sci* **2021**.
- [7] T. Xu, X. Ding, Y. Huang, C. Shao, L. Song, X. Gao, Z. Zhang, L. Qu, *Energ Environ Sci* **2019**, 12, 972.
- [8] Y. Huang, H. Cheng, C. Yang, H. Yao, C. Li, L. Qu, *Energ Environ Sci* **2019**, 12, 1848.
- [9] H. Cheng, Y. Huang, F. Zhao, C. Yang, P. Zhang, L. Jiang, G. Shi, L. Qu, *Energ Environ Sci* **2018**, 11, 2839.
- [10] Y. Liang, F. Zhao, Z. Cheng, Y. Deng, Y. Xiao, H. Cheng, P. Zhang, Y. Huang, H. Shao, L. Qu, *Energ Environ Sci* **2018**, 11, 1730.
- [11] F. Zhao, Y. Liang, H. Cheng, L. Jiang, L. Qu, *Energ Environ Sci* **2016**, 9, 912.
- [12] Y. Zhang, S. Guo, Z. G. Yu, H. Qu, W. Sun, J. Yang, L. Suresh, X. Zhang, J. J. Koh, S. C. Tan, *Adv Mater* **2022**, 2201228.
- [13] S. Yang, X. Tao, W. Chen, J. Mao, H. Luo, S. Lin, L. Zhang, J. Hao, *Adv Mater* **2022**, 2200693.
- [14] C. Yang, Y. Huang, H. Cheng, L. Jiang, L. Qu, *Adv Mater* **2019**, 31, 1805705.
- [15] D. Shen, M. Xiao, G. Zou, L. Liu, W. W. Duley, Y. N. Zhou, *Adv Mater* **2018**, 30, 1705925.
- [16] M. Li, L. Zong, W. Yang, X. Li, J. You, X. Wu, Z. Li, C. Li, *Adv Funct Mater* **2019**, 29, 1901798.
- [17] J. Liu, L. Huang, W. He, X. Cai, Y. Wang, L. Zhou, Y. Yuan, *Nano Energy* **2022**, 102, 107709.
- [18] W. He, H. Wang, Y. Huang, T. He, F. Chi, H. Cheng, D. Liu, L. Dai, L. Qu, *Nano Energy* **2022**, 95, 107017.
- [19] K. Zhang, L. Cai, A. Nilghaz, G. Chen, X. Wan, J. Tian, *Nano Energy* **2022**, 107288.
- [20] K. Fan, X. Liu, Y. Liu, Y. Li, X. Liu, W. Feng, X. Wang, *Nano Energy* **2022**, 91, 106605.
- [21] G. Ren, Z. Wang, B. Zhang, X. Liu, J. Ye, Q. Hu, S. Zhou, *Nano Energy* **2021**, 89, 106361.
- [22] S. Lee, J. Eun, S. Jeon, *Nano Energy* **2020**, 68, 104364.
- [23] D. He, Y. Yang, Y. Zhou, J. Wan, H. Wang, X. Fan, Q. Li, H. Huang, *Nano Energy* **2021**, 81, 105630.
- [24] W. Yang, X. Li, X. Han, W. Zhang, Z. Wang, X. Ma, M. Li, C. Li, *Nano Energy* **2020**, 71, 104610.
- [25] N. Chen, Q. Liu, C. Liu, G. Zhang, J. Jing, C. Shao, Y. Han, L. Qu, *Nano Energy* **2019**, 65, 104047.
- [26] H. Wang, H. Cheng, Y. Huang, C. Yang, D. Wang, C. Li, L. Qu, *Nano Energy* **2020**, 67, 104238.
- [27] Z. Luo, C. Liu, S. Fan, *Nano Energy* **2019**, 60, 371.
- [28] C. Shao, J. Gao, T. Xu, B. Ji, Y. Xiao, C. Gao, Y. Zhao, L. Qu, *Nano Energy* **2018**, 53, 698.
- [29] P. Li, N. Su, Z. Wang, J. Qiu, *Acs Nano* **2021**.

- [30] W. Yang, L. Lv, X. Li, X. Han, M. Li, C. Li, *Acs Nano* **2020**, *14*, 10600.
- [31] J. Tan, S. Fang, Z. Zhang, J. Yin, L. Li, X. Wang, W. Guo, *Nat Commun* **2022**, *13*.
- [32] Y. Zhang, T. Yang, K. Shang, F. Guo, Y. Shang, S. Chang, L. Cui, X. Lu, Z. Jiang, J. Zhou, C. Fu, Q. He, *Nat Commun* **2022**, *13*.
- [33] H. Wang, T. He, X. Hao, Y. Huang, H. Yao, F. Liu, H. Cheng, L. Qu, *Nat Commun* **2022**, *13*.
- [34] Y. Long, P. He, Z. Shao, Z. Li, H. Kim, A. M. Yao, Y. Peng, R. Xu, C. H. Ahn, S. Lee, J. Zhong, L. Lin, *Nat Commun* **2021**, *12*, 5287.
- [35] S. Kim, S. Choi, H. G. Lee, D. Jin, G. Kim, T. Kim, J. S. Lee, W. Shim, *Nat Commun* **2021**, *12*.
- [36] Y. Huang, H. Cheng, C. Yang, P. Zhang, Q. Liao, H. Yao, G. Shi, L. Qu, *Nat Commun* **2018**, *9*, 4166.
- [37] G. Ren, Q. Hu, J. Ye, X. Liu, S. Zhou, Z. He, *Chem Eng J* **2022**, *441*, 135921.
- [38] J. Xie, Y. Wang, S. Chen, *Chemical engineering journal (Lausanne, Switzerland : 1996)* **2021**, 133236.
- [39] Z. Sun, L. Feng, X. Wen, L. Wang, X. Qin, J. Yu, *Mater Horiz* **2021**, *8*, 2303.
- [40] Z. Sun, L. Feng, C. Xiong, X. He, L. Wang, X. Qin, J. Yu, *J Mater Chem a* **2021**, *9*, 7085.
- [41] X. Gao, T. Xu, C. Shao, Y. Han, B. Lu, Z. Zhang, L. Qu, *J Mater Chem a* **2019**, *7*, 20574.
- [42] L. Yang, F. Yang, X. Liu, K. Li, Y. Zhou, Y. Wang, T. Yu, M. Zhong, X. Xu, L. Zhang, W. Shen, D. Wei, *Proceedings of the National Academy of Sciences* **2021**, *118*, e2023164118.
- [43] Z. Sun, X. Wen, L. Wang, J. Yu, X. Qin, *Energ Environ Sci* **2022**, *15*, 4584.
- [44] L. Wang, L. Feng, Z. Sun, X. He, R. Wang, X. Qin, J. Yu, *Science China. Technological sciences* **2022**, *65*, 450.
- [45] W. Lu, T. Ding, X. Wang, C. Zhang, T. Li, K. Zeng, G. W. Ho, *Nano Energy* **2022**, *104*, 107892.
- [46] C. Yang, H. Wang, J. Bai, T. He, H. Cheng, T. Guang, H. Yao, L. Qu, *Nat Commun* **2022**, *13*.
- [47] J. Chen, Y. Li, Y. Zhang, D. Ye, C. Lei, K. Wu, Q. Fu, *Adv Funct Mater* **2022**, *32*, 2203666.
- [48] H. Jin, S. G. Yoon, W. H. Lee, Y. H. Cho, J. Han, J. Park, Y. S. Kim, *Energ Environ Sci* **2020**.
- [49] A. S. Aji, R. Nishi, H. Ago, Y. Ohno, *Nano Energy* **2020**, *68*, 104370.
- [50] B. Shao, Y. Wu, Z. Song, H. Yang, X. Chen, Y. Zou, J. Zang, F. Yang, T. Song, Y. Wang, M. Shao, B. Sun, *Nano Energy* **2022**, *94*, 106917.
- [51] S. S. Kwak, S. Lin, J. H. Lee, H. Ryu, T. Y. Kim, H. Zhong, H. Chen, S. Kim, *Acs Nano* **2016**, *10*, 7297.
- [52] T. Zhao, Y. Hu, W. Zhuang, Y. Xu, J. Feng, P. Chen, H. Peng, *ACS Materials Letters* **2021**, *3*, 1448.
- [53] Y. Huang, D. Liu, X. Gao, J. Zhu, Y. Zhang, M. Zhang, *Adv Funct Mater* **2022**, 2209484.
- [54] Y. Yan, X. Zhou, S. Feng, Y. Lu, J. Qian, P. Zhang, X. Yu, Y. Zheng, F. Wang, K. Liu, S. Lin, *The Journal of Physical Chemistry C* **2021**, *125*, 14180.
- [55] G. Xue, Y. Xu, T. Ding, J. Li, J. Yin, W. Fei, Y. Cao, J. Yu, L. Yuan, L. Gong, *Nat Nanotechnol* **2017**, *12*, 317.
- [56] L. Li, S. Feng, L. Du, Y. Wang, C. Ge, X. Yang, Y. Wu, M. Liu, S. Wang, Y. Bai, F. Sun, T. Zhang, *Nano Energy* **2022**, *99*, 107356.
- [57] S. G. Yoon, H. Jin, W. H. Lee, J. Han, Y. H. Cho, Y. S. Kim, *Nano Energy* **2021**, *80*, 105522.
- [58] L. Li, S. Gao, M. Hao, X. Yang, S. Feng, L. Li, S. Wang, Z. Xiong, F. Sun, Y. Li, Y. Bai, Y. Zhao, Z. Wang, T. Zhang, *Nano Energy* **2021**, *85*, 105970.
- [59] S. Shin, J. Y. Cheong, H. Lim, V. V. T. Padil, A. Venkateshaiah, I. Kim, *Nano Energy* **2020**, *74*, 104827.

- [60] L. Li, M. Hao, X. Yang, F. Sun, Y. Bai, H. Ding, S. Wang, T. Zhang, *Nano Energy* **2020**, *72*, 104663.
- [61] B. Shao, Z. Song, X. Chen, Y. Wu, Y. Li, C. Song, F. Yang, T. Song, Y. Wang, S. T. Lee, B. Sun, *Acs Nano* **2021**.
- [62] Y. Qin, Y. Wang, X. Sun, Y. Li, H. Xu, Y. Tan, Y. Li, T. Song, B. Sun, *Angewandte Chemie International Edition* **2020**, *59*, 10619.
- [63] B. Ji, N. Chen, C. Shao, Q. Liu, J. Gao, T. Xu, H. Cheng, L. Qu, *J Mater Chem a* **2019**, *7*, 6766.
- [64] G. Zhang, Z. Duan, X. Qi, Y. Xu, L. Li, W. Ma, H. Zhang, C. Liu, W. Yao, *Carbon* **2019**, *148*, 1.
- [65] X. Zhou, W. Zhang, C. Zhang, Y. Tan, J. Guo, Z. Sun, X. Deng, *Acs Appl Mater Inter* **2020**, *12*, 11232.
- [66] C. Shao, B. Ji, T. Xu, J. Gao, X. Gao, Y. Xiao, Y. Zhao, N. Chen, L. Jiang, L. Qu, *Acs Appl Mater Inter* **2019**, *11*, 30927.
- [67] T. G. Yun, J. Bae, H. G. Nam, D. Kim, K. R. Yoon, S. M. Han, I. Kim, *Nano Energy* **2022**, *94*, 106946.
- [68] Z. Sun, L. Feng, X. Wen, L. Wang, X. Qin, J. Yu, *ACS Appl Mater Interfaces* **2021**, *13*, 56226.
- [69] X. Wang, F. Lin, X. Wang, S. Fang, J. Tan, W. Chu, R. Rong, J. Yin, Z. Zhang, Y. Liu, W. Guo, *Chem Soc Rev* **2022**, *51*, 4902.
